# Supplementary material for: Elevating VEGF-A and PDGF-BB secretion by salidroside enhances neoangiogenesis in diabetic hind-limb ischemia
Source: PubMed Central journal article supplement (PMC5722555; doi:10.18632/oncotarget.21907), 2017-10-13
Supplement: oncotarget-08-97187-s001.pdf [file oncotarget-08-97187-s001.pdf]

## Elevating VEGF-A and PDGF-BB secretion by solidroside enhances neoangiogenesis in diabetic hind-limb ischemia

### SUPPLEMENTARY MATERIALS

**Supplementary Table 1: Blood glucose concentration in diabetic hind-limb ischemia model mice during the experiment**

| Control (mmol/L) |         |         |                                  |                  | Solidroside (mmol/L) |         |         |                                  |                  |
|------------------|---------|---------|----------------------------------|------------------|----------------------|---------|---------|----------------------------------|------------------|
| No               | 1 w HFD | 3 w HFD | 1 w after STZ (0 d post-surgery) | 3 w post-surgery | No                   | 1 w HFD | 3 w HFD | 1 w after STZ (0 d post-surgery) | 3 w post-surgery |
| 1                | 6.7     | 5.4     | 22.5                             | 32.9             | 1                    | 7.8     | 8.9     | 21.5                             | 20.6             |
| 2                | 8.4     | 6.2     | 21                               | 25.5             | 2                    | 4.8     | 7.4     | 17.5                             | 23.6             |
| 3                | 9.6     | 7.7     | 21.2                             | 24.9             | 3                    | 5.9     | 9.2     | 28.8                             | 21               |
| 4                | 10.5    | 5.5     | 20.3                             | 19.4             | 4                    | 7.5     | 9.1     | 17.3                             | 23.2             |
| 5                | 6.8     | 7.3     | 20                               | 18.1             | 5                    | 7.6     | 8.7     | 20                               | 21.9             |
| 6                | 6       | 8.3     | 23.1                             | 19.4             | 6                    | 7.2     | 7.8     | 21.8                             | 23.4             |
| 7                | 8.5     | 7.7     | 25.2                             | 25.9             | 7                    | 4.3     | 7.2     | 25.5                             | 21               |
| Mean             | 8.07    | 6.87    | 21.9                             | 23.73            | Mean                 | 6.44    | 8.33    | 21.77                            | 22.1             |
| Stdev            | 1.65    | 1.16    | 1.83                             | 5.20             | Stdev                | 1.44    | 0.84    | 4.18                             | 1.28             |

HFD: high fat diet; STZ: streptozotocin administration.

**Supplementary Table 2: Primer pairs used for gene quantification by quantitative RT-PCR**

| Gene           | Ref Seq No.  | Forward               | Reverse               |
|----------------|--------------|-----------------------|-----------------------|
| VEGF-A         | NM_001025257 | GCAGAAGTCCCATGAAGTGAT | GTCTCAATCGGACGGCAGTAG |
| PDGF-B         | NM_011057    | AGCAGAGCCTGCTGTAATCG  | GGCTTCTTTCGCACAATCTC  |
| PHD1           | NM_053208.4  | GGAACCCACATGAGGTGAAG  | ACCTTCTGTCCCCGATGCT   |
| PHD2           | NM_053207.2  | GAAGCTGGGCAACTACAGGA  | CATGTCACGCATCTTCCATC  |
| PHD3           | NM_028133.2  | CAGGTTATGTTCCGCATGTG  | CAGGACCCCTCCGTGTAAC   |
| $\beta$ -Actin | NM_007393    | AGATGTGGATCAGCAAGCAG  | GCGCAAGTTAGGTTTTGTCA  |

**Supplementary Table 3: Antibodies and chemicals used for western blotting, immunohistochemistry, immunofluorescence, and phalloidin staining**

| Antibody                                              | Product number | Maker                     | Experiment           | Dilution    |
|-------------------------------------------------------|----------------|---------------------------|----------------------|-------------|
| anti-VEGF-A                                           | sc-152         | Santa Cruz Biotechnology  | Western Blotting     | 1/500       |
| anti-PDGF-BB                                          | Ab23914        | Abcam                     | Western Blotting     | 1/1000      |
| anti-PHD1                                             | NB100-310      | Novus Biological          | Western Blotting     | 1/1000      |
| anti-PHD2                                             | NB100-138      | Novus Biological          | Western Blotting     | 1/1000      |
| anti-PHD3                                             | Ab184714       | Abcam                     | Western Blotting     | 1/2000      |
| anti- $\beta$ -Actin                                  | #4967          | Cell Signaling Technology | Western Blotting     | 1/10000     |
| anti-PECAM1                                           | 550274         | BD Pharmingen             | Immunohistochemistry | 1/100       |
| Monoclonal anti-murine $\alpha$ -SMA<br>Cy3 conjugate | C6198          | Sigma-Aldrich             | Immunohistochemistry | 1/100       |
| Alexa Fluor 488 Goat Anti-Rat IgG                     | A11006         | Invitrogen                | Immunohistochemistry | 1/100       |
| anti-Ki67                                             | Ab15580        | Abcam                     | Immunofluorescence   | 1/300       |
| Alexa Fluor 488 Donkey<br>Anti- rabbit IgG            | A21206         | Invitrogen                | Immunofluorescence   | 1/1000      |
| Phalloidin                                            | A34055         | Invitrogen                | Immunofluorescence   | 1/250       |
| DAPI                                                  | C1006          | Beyotime                  | Immunofluorescence   | Not diluted |

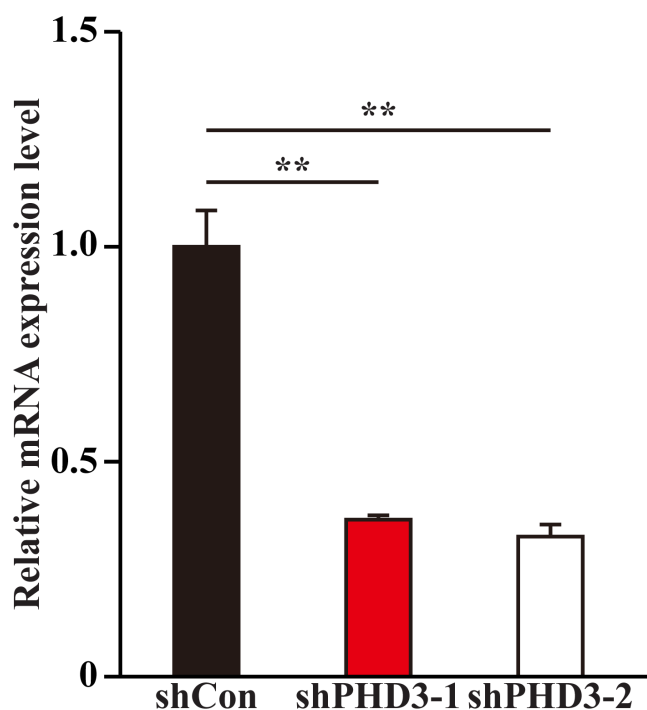

**Supplementary Figure 1: The efficacies of short hairpin RNA (shRNA) expression vectors targeting skeletal muscle cells PHD3 under hyperglycemia.** The PHD3 mRNA expression level in the C2C12 cells transfected with shPHD3s and cultured under hyperglycemia, as examined by quantitative RT-PCR.  $\beta$ -Actin was used for normalization. Cells transfected with shCon were used as control. Quantification data were shown as relative to control and expressed as mean  $\pm$  S.D. ( $n = 3$  from three independent experiments). \*\* $P < 0.01$ .

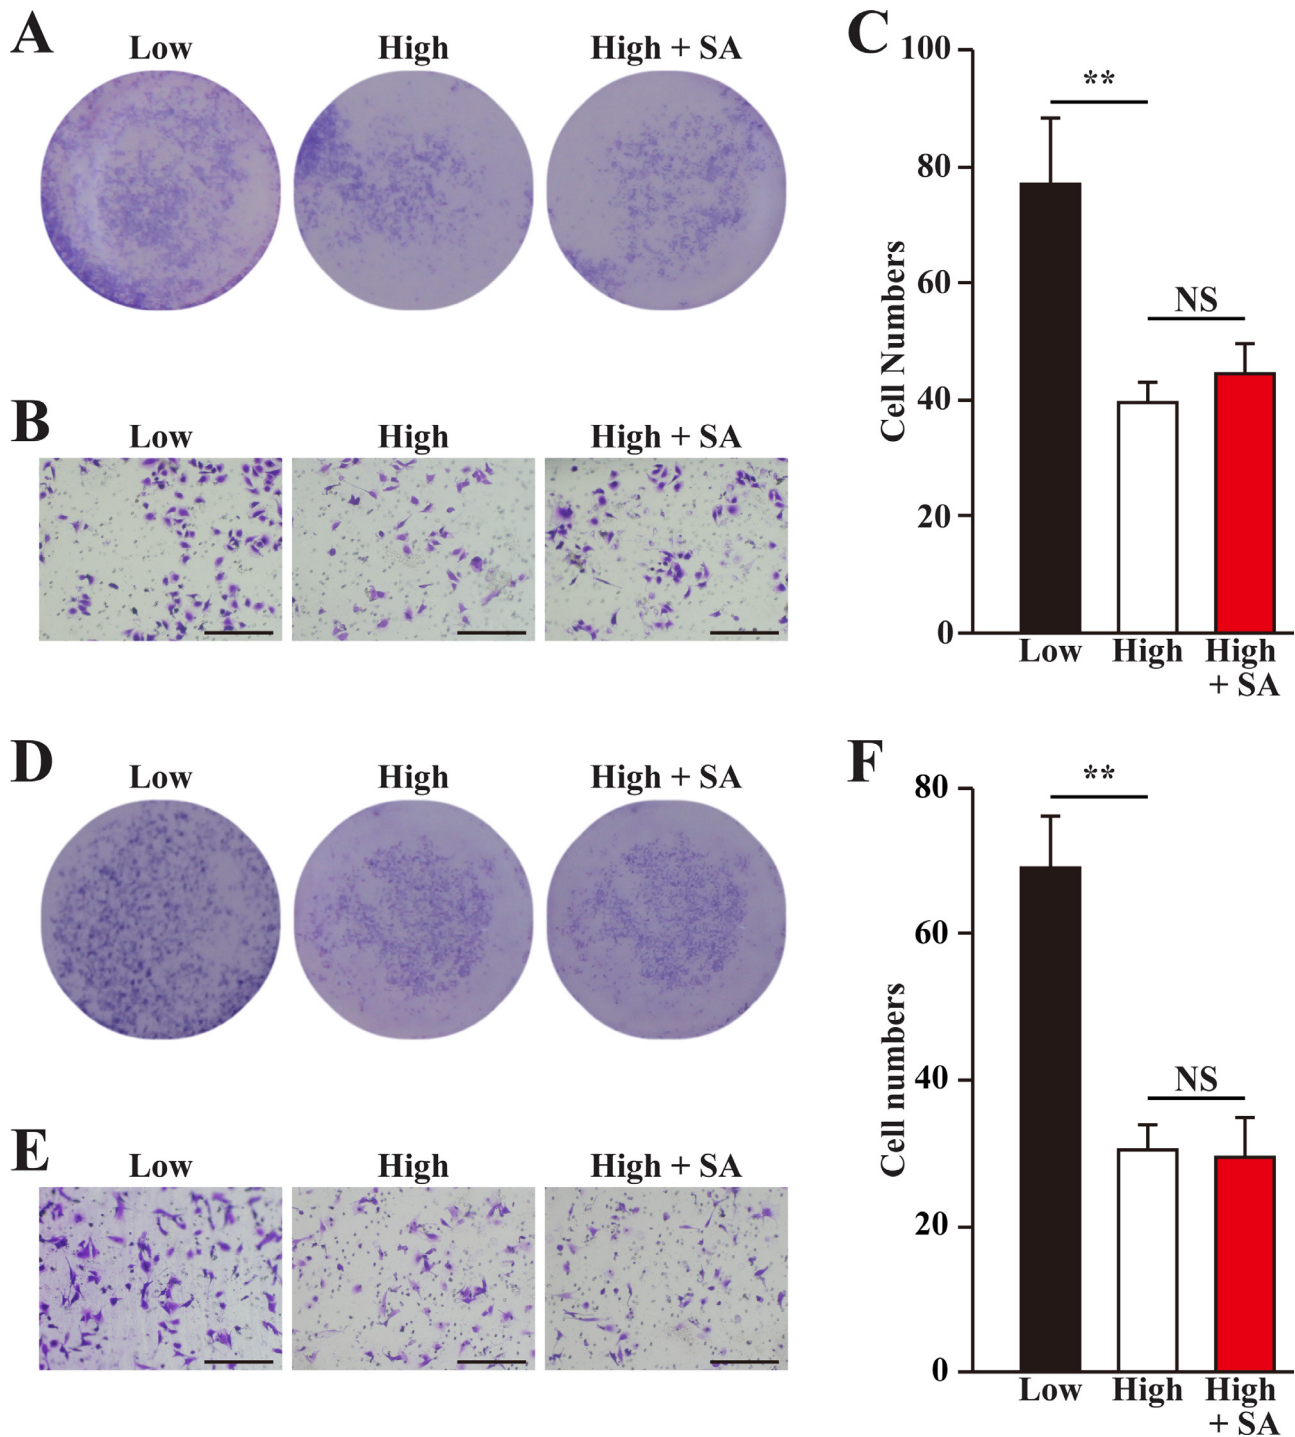

**Supplementary Figure 2: The effects of salidroside on endothelial cells and smooth muscle cells under hyperglycemia.**

(A) The number of HUVECs cultured under hyperglycemia with or without salidroside, as analyzed using crystal violet. Representative images were shown. (B, C) The mobility of HUVECs cultured under hyperglycemia with or without salidroside, as examined using transwell chamber assay: (B) representative images (scale bars: 100  $\mu$ m); and (C) quantification of migrated cells. (D) The number of MOVAS cells cultured under hyperglycemia with or without salidroside, as analyzed using crystal violet. Representative images were shown. (E, F) The mobility of MOVAS cells cultured under hyperglycemia with or without salidroside, as examined using transwell chamber assay: (E) representative images (scale bars: 100  $\mu$ m); and (F) quantification of migrated cells. All experiments were done under hypoxia. Quantification data were expressed as mean  $\pm$  S.D. ( $n = 6$ ). \*\* $P < 0.01$ ; NS: not significant; Low: low glucose; High: high glucose; SA: salidroside.

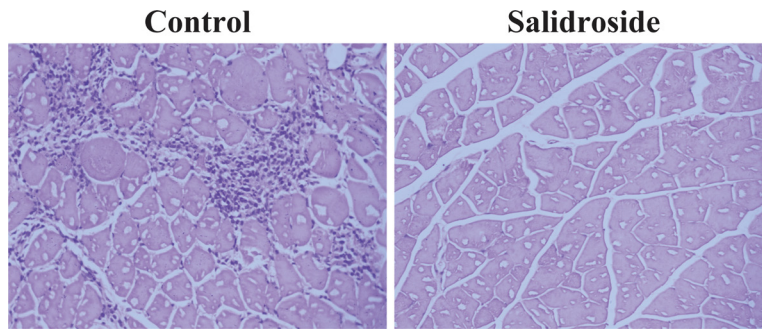

**Supplementary Figure 3: The morphology of the gastrocnemius muscle tissue obtained from the ischemic hind limb of diabetic HLI mice treated with salidroside.** The gastrocnemius muscle tissue obtained from the ischemic hind limb of diabetic HLI model mice treated with PBS (left panel) or salidroside (right panel) were stained using hematoxylin & eosin staining. Representative images were shown.
